# Supplementary material for: Identifying Cis-Regulatory Changes Involved in the Evolution of Aerobic Fermentation in Yeasts
Source: PubMed Central journal article supplement — Genome Biol Evol. 2013 May 6;5(6):1065–78. doi: 10.1093/gbe/evt067 (PMC3698916; doi:10.1093/gbe/evt067), 2013-05-06
Supplement: supp_evt067_Table_S6.pdf [file supp_evt067_Table_S6.pdf]

SCE

| Motif                   | E value  | Standard                                                                            | Reverse Complement                                                                   |
|-------------------------|----------|-------------------------------------------------------------------------------------|--------------------------------------------------------------------------------------|
| <a href="#">Motif 1</a> | 5.20E-08 | 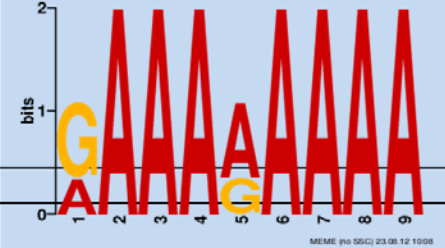   |    |
|                         | 43 sites |                                                                                     |                                                                                      |
| <a href="#">Motif 2</a> | 2.70E-04 |    |    |
|                         | 37 sites |                                                                                     |                                                                                      |
| <a href="#">Motif 3</a> | 6.20E+01 |   |   |
|                         | 26 sites |                                                                                     |                                                                                      |
| <a href="#">Motif 4</a> | 1.30E+04 |  |  |
|                         | 17 sites |                                                                                     |                                                                                      |
| <a href="#">Motif 5</a> | 3.30E+05 |  |  |
|                         | 35 sites |                                                                                     |                                                                                      |
| <a href="#">Motif 6</a> | 6.60E+05 |  |  |
|                         | 8 sites  |                                                                                     |                                                                                      |

|                             |          |                                                                                     |                                                                                      |
|-----------------------------|----------|-------------------------------------------------------------------------------------|--------------------------------------------------------------------------------------|
| <a href="#">Motif 7</a>     | 1.70E+06 | 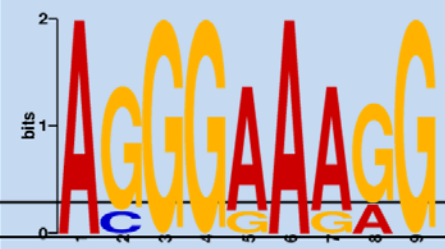   |    |
|                             | 13 sites | <small>MEME (no SSC) 23.08.12 1024</small>                                          | <small>MEME (no SSC) 23.08.12 1024</small>                                           |
| <a href="#">Motif 8</a>     | 2.20E+06 |    |    |
|                             | 2 sites  | <small>MEME (no SSC) 23.08.12 1028</small>                                          | <small>MEME (no SSC) 23.08.12 1024</small>                                           |
| <a href="#">Motif 9</a>     | 1.90E+06 |   |   |
|                             | 2 sites  | <small>MEME (no SSC) 23.08.12 1028</small>                                          | <small>MEME (no SSC) 23.08.12 1028</small>                                           |
| <a href="#">Motif 10</a>    | 2.00E+06 |  |  |
|                             | 2 sites  | <small>MEME (no SSC) 23.08.12 1031</small>                                          | <small>MEME (no SSC) 23.08.12 1031</small>                                           |
| SPA <a href="#">Motif 1</a> | 6.80E-16 |  |  |
|                             | 46 sites | <small>MEME (no SSC) 23.08.12 1258</small>                                          | <small>MEME (no SSC) 23.08.12 1028</small>                                           |
| <a href="#">Motif 2</a>     | 7.50E-05 |  |  |
|                             | 35 sites | <small>MEME (no SSC) 23.08.12 1131</small>                                          | <small>MEME (no SSC) 23.08.12 1131</small>                                           |

|                         |          |                                                                                     |                                                                                      |
|-------------------------|----------|-------------------------------------------------------------------------------------|--------------------------------------------------------------------------------------|
| <a href="#">Motif 3</a> | 3.60E+04 |                                                                                     |                                                                                      |
|                         | 14 sites | 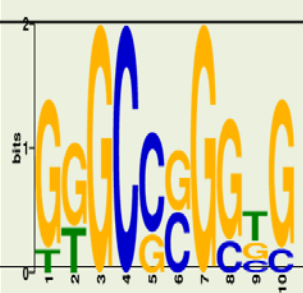   |    |
| <a href="#">Motif 4</a> | 1.50E+05 |                                                                                     |                                                                                      |
|                         | 4 sites  |    |    |
| <a href="#">Motif 5</a> | 5.70E+04 |                                                                                     |                                                                                      |
|                         | 9 sites  |   |   |
| <a href="#">Motif 6</a> | 9.60E+05 |                                                                                     |                                                                                      |
|                         | 13 sites |  |  |
| <a href="#">Motif 7</a> | 1.30E+06 |                                                                                     |                                                                                      |
|                         | 2 sites  |  |  |
| <a href="#">Motif 8</a> | 1.30E+06 |                                                                                     |                                                                                      |
|                         | 2 sites  |  |  |

|     |                          |          |                                                                                     |                                                                                      |
|-----|--------------------------|----------|-------------------------------------------------------------------------------------|--------------------------------------------------------------------------------------|
|     |                          |          |    |    |
|     | <a href="#">Motif 9</a>  | 1.30E+06 |    |    |
|     |                          | 2 sites  |                                                                                     |                                                                                      |
|     | <a href="#">Motif 10</a> | 1.50E+06 |    |    |
|     |                          | 2 sites  |                                                                                     |                                                                                      |
| SMI | <a href="#">Motif 1</a>  | 1.90E-08 |   |   |
|     |                          | 31 sites |                                                                                     |                                                                                      |
|     | <a href="#">Motif 2</a>  | 3.10E-05 |  |  |
|     |                          | 49 sites |                                                                                     |                                                                                      |
|     | <a href="#">Motif 3</a>  | 9.00E+03 |  |  |
|     |                          | 15 sites |                                                                                     |                                                                                      |



|                         |          |                                                                                     |                                                                                      |
|-------------------------|----------|-------------------------------------------------------------------------------------|--------------------------------------------------------------------------------------|
| <a href="#">Motif 4</a> | 1.10E+06 | 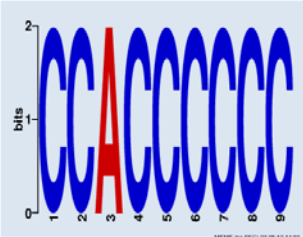   |    |
|                         | 2 sites  |                                                                                     |                                                                                      |
| <a href="#">Motif 5</a> | 9.90E+05 |    |    |
|                         | 2 sites  |                                                                                     |                                                                                      |
| <a href="#">Motif 6</a> | 1.10E+06 |   |   |
|                         | 2 sites  |                                                                                     |                                                                                      |
| <a href="#">Motif 7</a> | 1.10E+06 |  |  |
|                         | 2 sites  |                                                                                     |                                                                                      |
| <a href="#">Motif 8</a> | 9.90E+05 |  |  |
|                         | 8 sites  |                                                                                     |                                                                                      |

|     |                          |          |                                                                                     |                                                                                      |
|-----|--------------------------|----------|-------------------------------------------------------------------------------------|--------------------------------------------------------------------------------------|
|     | <a href="#">Motif 9</a>  | 1.80E+06 | 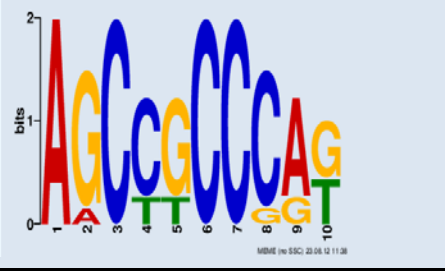   |    |
|     |                          | 9 sites  |                                                                                     |                                                                                      |
|     | <a href="#">Motif 10</a> | 1.30E+06 |    |    |
|     |                          | 2 sites  |                                                                                     |                                                                                      |
| SBA | <a href="#">Motif 1</a>  | 1.70E-32 |   |   |
|     |                          | 50 sites |                                                                                     |                                                                                      |
|     | <a href="#">Motif 2</a>  | 8.50E-01 |  |  |
|     | 26 sites                 |          |                                                                                     |                                                                                      |
|     | <a href="#">Motif 3</a>  | 1.30E+01 |  |  |
|     | 15 sites                 |          |                                                                                     |                                                                                      |

|                         |          |                                                                                     |                                                                                      |
|-------------------------|----------|-------------------------------------------------------------------------------------|--------------------------------------------------------------------------------------|
| <a href="#">Motif 4</a> | 3.40E+02 |    |    |
|                         | 33 sites | <small>MEME (v0.5.0) 23.08.12 1048</small>                                          | <small>MEME (v0.5.0) 23.08.12 1048</small>                                           |
| <a href="#">Motif 5</a> | 3.40E+04 |    |    |
|                         | 14 sites | <small>MEME (v0.5.0) 23.08.12 1047</small>                                          | <small>MEME (v0.5.0) 23.08.12 1047</small>                                           |
| <a href="#">Motif 6</a> | 4.90E+05 |   |   |
|                         | 32 sites | <small>MEME (v0.5.0) 23.08.12 1047</small>                                          | <small>MEME (v0.5.0) 23.08.12 1047</small>                                           |
| <a href="#">Motif 7</a> | 1.80E+06 |  |  |
|                         | 2 sites  | <small>MEME (v0.5.0) 23.08.12 1051</small>                                          | <small>MEME (v0.5.0) 23.08.12 1051</small>                                           |
| <a href="#">Motif 8</a> | 1.80E+06 |  |  |
|                         | 2 sites  | <small>MEME (v0.5.0) 23.08.12 1051</small>                                          | <small>MEME (v0.5.0) 23.08.12 1051</small>                                           |

|     |                          |          |                                                                                     |                                                                                      |
|-----|--------------------------|----------|-------------------------------------------------------------------------------------|--------------------------------------------------------------------------------------|
|     | <a href="#">Motif 9</a>  | 3.40E+06 | 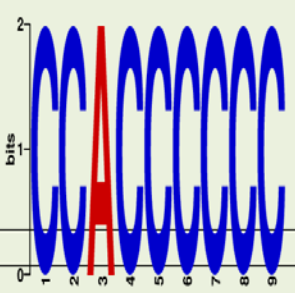   |    |
|     |                          | 2 sites  |                                                                                     |                                                                                      |
|     | <a href="#">Motif 10</a> | 3.40E+06 |    |    |
|     |                          | 2 sites  |                                                                                     |                                                                                      |
| CGL | <a href="#">Motif 1</a>  | 3.80E-29 |   |   |
|     |                          | 43 sites |                                                                                     |                                                                                      |
|     |                          |          |                                                                                     |                                                                                      |
| CGL | <a href="#">Motif 2</a>  | 1.00E-01 |  |  |
|     |                          | 33 sites |                                                                                     |                                                                                      |
|     |                          |          |                                                                                     |                                                                                      |
| CGL | <a href="#">Motif 3</a>  | 5.00E-01 |  |  |
|     |                          | 40 sites |                                                                                     |                                                                                      |
|     |                          |          |                                                                                     |                                                                                      |

|                         |          |  |  |
|-------------------------|----------|--|--|
| <a href="#">Motif 4</a> | 1.60E+02 |  |  |
|                         | 13 sites |  |  |
| <a href="#">Motif 5</a> | 3.80E+03 |  |  |
|                         | 28 sites |  |  |
| <a href="#">Motif 6</a> | 1.50E+05 |  |  |
|                         | 24 sites |  |  |
| <a href="#">Motif 7</a> | 3.20E+05 |  |  |
|                         | 15 sites |  |  |
| <a href="#">Motif 8</a> | 1.70E+06 |  |  |
|                         | 2 sites  |  |  |



|                         |                          |                                                                                     |                                                                                      |                                                                                      |
|-------------------------|--------------------------|-------------------------------------------------------------------------------------|--------------------------------------------------------------------------------------|--------------------------------------------------------------------------------------|
|                         | <a href="#">Motif 9</a>  | 1.70E+06                                                                            | 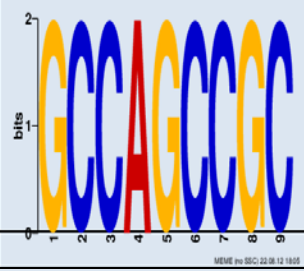    |    |
|                         |                          | 2 sites                                                                             |                                                                                      |                                                                                      |
|                         | <a href="#">Motif 10</a> | 1.90E+06                                                                            |     |    |
|                         |                          | 2 sites                                                                             |                                                                                      |                                                                                      |
| SCA                     | <a href="#">Motif 1</a>  | 5.00E+00                                                                            |    |   |
|                         |                          | 27 sites                                                                            |                                                                                      |                                                                                      |
|                         | <a href="#">Motif 2</a>  | 3.30E+03                                                                            |   |  |
|                         | 13 sites                 |                                                                                     |                                                                                      |                                                                                      |
| <a href="#">Motif 3</a> | 4.80E+03                 |  |  |                                                                                      |
|                         | 24 sites                 |                                                                                     |                                                                                      |                                                                                      |

|                         |          |  |  |
|-------------------------|----------|--|--|
| <a href="#">Motif 4</a> | 1.50E+05 |  |  |
|                         | 12 sites |  |  |
| <a href="#">Motif 5</a> | 3.00E+05 |  |  |
|                         | 24 sites |  |  |
| <a href="#">Motif 6</a> | 1.30E+06 |  |  |
|                         | 2 sites  |  |  |
| <a href="#">Motif 7</a> | 1.40E+06 |  |  |
|                         | 2 sites  |  |  |
| <a href="#">Motif 8</a> | 1.40E+06 |  |  |
|                         | 2 sites  |  |  |

|     |                          |          |                                                                                     |                                                                                      |
|-----|--------------------------|----------|-------------------------------------------------------------------------------------|--------------------------------------------------------------------------------------|
|     | <a href="#">Motif 9</a>  | 1.40E+06 | 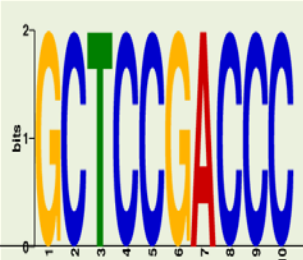   |    |
|     |                          | 2 sites  |                                                                                     |                                                                                      |
|     | <a href="#">Motif 10</a> | 3.50E+06 |    |    |
|     | 30 sites                 |          |                                                                                     |                                                                                      |
| ZRO | <a href="#">Motif 1</a>  | 5.00E+00 |   |   |
|     |                          | 27 sites |                                                                                     |                                                                                      |
|     | <a href="#">Motif 2</a>  | 3.30E+03 |  |  |
|     |                          | 13 sites |                                                                                     |                                                                                      |
|     | <a href="#">Motif 3</a>  | 4.80E+03 |  |  |
|     |                          | 24 sites |                                                                                     |                                                                                      |

|                         |          |                                                                                     |                                                                                      |
|-------------------------|----------|-------------------------------------------------------------------------------------|--------------------------------------------------------------------------------------|
| <a href="#">Motif 4</a> | 1.50E+05 | 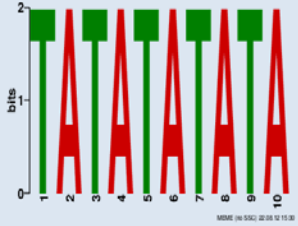   |    |
|                         | 12 sites |                                                                                     |                                                                                      |
| <a href="#">Motif 5</a> | 3.00E+05 |    |    |
|                         | 24 sites |                                                                                     |                                                                                      |
| <a href="#">Motif 6</a> | 1.30E+06 |   |   |
|                         | 2 sites  |                                                                                     |                                                                                      |
| <a href="#">Motif 7</a> | 1.40E+06 |  |  |
|                         | 2 sites  |                                                                                     |                                                                                      |
| <a href="#">Motif 8</a> | 1.40E+06 |  |  |
|                         | 2 sites  |                                                                                     |                                                                                      |

KTH

|                          |          |                                                                                     |                                                                                      |
|--------------------------|----------|-------------------------------------------------------------------------------------|--------------------------------------------------------------------------------------|
| <a href="#">Motif 9</a>  | 1.40E+06 |    |    |
|                          | 2 sites  | <small>MEME (v3.5.2) 20.08.12 15:48</small>                                         | <small>MEME (v3.5.2) 22.08.12 15:48</small>                                          |
| <a href="#">Motif 10</a> | 3.50E+06 |    |    |
|                          | 30 sites | <small>MEME (v3.5.2) 22.08.12 15:42</small>                                         | <small>MEME (v3.5.2) 22.08.12 15:42</small>                                          |
|                          |          |                                                                                     |                                                                                      |
| <a href="#">Motif 1</a>  | 9.10E-12 |   |   |
|                          | 49 sites | <small>MEME (v3.5.2) 22.08.12 13:41</small>                                         | <small>MEME (v3.5.2) 22.08.12 13:41</small>                                          |
| <a href="#">Motif 2</a>  | 4.90E-05 |  |  |
|                          | 36 sites | <small>MEME (v3.5.2) 22.08.12 13:46</small>                                         | <small>MEME (v3.5.2) 22.08.12 13:46</small>                                          |
| <a href="#">Motif 3</a>  | 4.60E-04 |  |  |
|                          | 30 sites | <small>MEME (v3.5.2) 22.08.12 13:48</small>                                         | <small>MEME (v3.5.2) 22.08.12 13:48</small>                                          |



|                         |          |                                                                                     |                                                                                      |
|-------------------------|----------|-------------------------------------------------------------------------------------|--------------------------------------------------------------------------------------|
| <a href="#">Motif 4</a> | 4.50E+05 | 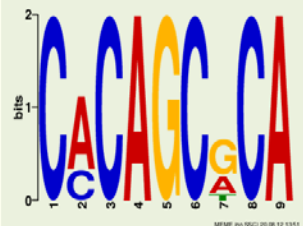   |    |
|                         | 17 sites |                                                                                     |                                                                                      |
| <a href="#">Motif 5</a> | 4.40E+06 |    |    |
|                         | 4 sites  |                                                                                     |                                                                                      |
| <a href="#">Motif 6</a> | 7.90E+06 |   |   |
|                         | 2 sites  |                                                                                     |                                                                                      |
| <a href="#">Motif 7</a> | 9.40E+06 |  |  |
|                         | 4 sites  |                                                                                     |                                                                                      |
| <a href="#">Motif 8</a> | 9.30E+06 |  |  |
|                         | 21 sites |                                                                                     |                                                                                      |

KWA

|                          |          |  |  |
|--------------------------|----------|--|--|
| <a href="#">Motif 9</a>  | 7.10E+06 |  |  |
|                          | 24 sites |  |  |
| <a href="#">Motif 10</a> | 1.20E+07 |  |  |
|                          | 2 sites  |  |  |
| <a href="#">Motif 1</a>  | 1.10E+00 |  |  |
|                          | 23 sites |  |  |
| <a href="#">Motif 2</a>  | 8.70E-01 |  |  |
|                          | 24 sites |  |  |
| <a href="#">Motif 3</a>  | 1.80E+05 |  |  |
|                          | 15 sites |  |  |

|                         |          |                                                                                     |                                                                                      |
|-------------------------|----------|-------------------------------------------------------------------------------------|--------------------------------------------------------------------------------------|
| <a href="#">Motif 4</a> | 2.90E+05 | 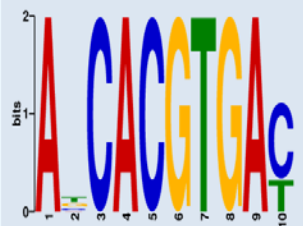   |    |
|                         | 10 sites |                                                                                     |                                                                                      |
| <a href="#">Motif 5</a> | 1.10E+06 |    |    |
|                         | 22 sites |                                                                                     |                                                                                      |
| <a href="#">Motif 6</a> | 2.70E+06 |   |   |
|                         | 5 sites  |                                                                                     |                                                                                      |
| <a href="#">Motif 7</a> | 2.70E+06 |  |  |
|                         | 2 sites  |                                                                                     |                                                                                      |
| <a href="#">Motif 8</a> | 2.90E+06 |  |  |
|                         | 9 sites  |                                                                                     |                                                                                      |

SKL

|                          |          |                                             |                                             |
|--------------------------|----------|---------------------------------------------|---------------------------------------------|
| <a href="#">Motif 9</a>  | 3.90E+06 |                                             |                                             |
|                          | 2 sites  | <small>MEME (v0.55C) 20.08.12 12:37</small> | <small>MEME (v0.55C) 20.08.12 12:37</small> |
| <a href="#">Motif 10</a> | 6.80E+06 |                                             |                                             |
|                          | 3 sites  | <small>MEME (v0.55C) 20.08.12 12:21</small> | <small>MEME (v0.55C) 20.08.12 12:21</small> |
| <a href="#">Motif 1</a>  | 1.40E-36 |                                             |                                             |
|                          | 50 sites | <small>MEME (v0.55C) 20.08.12 12:37</small> | <small>MEME (v0.55C) 20.08.12 12:37</small> |
| <a href="#">Motif 2</a>  | 3.20E+01 |                                             |                                             |
|                          | 31 sites | <small>MEME (v0.55C) 20.08.12 12:37</small> | <small>MEME (v0.55C) 20.08.12 12:37</small> |
| <a href="#">Motif 3</a>  | 2.40E+02 |                                             |                                             |
|                          | 17 sites | <small>MEME (v0.55C) 20.08.12 12:37</small> | <small>MEME (v0.55C) 20.08.12 12:37</small> |

|                         |          |  |  |
|-------------------------|----------|--|--|
| <a href="#">Motif 4</a> | 5.10E+05 |  |  |
|                         | 7 sites  |  |  |
| <a href="#">Motif 5</a> | 2.50E+06 |  |  |
|                         | 18 sites |  |  |
| <a href="#">Motif 6</a> | 2.60E+06 |  |  |
|                         | 2 sites  |  |  |
| <a href="#">Motif 7</a> | 1.50E+06 |  |  |
|                         | 2 sites  |  |  |
| <a href="#">Motif 8</a> | 2.40E+06 |  |  |
|                         | 2 sites  |  |  |



|     |                          |          |                                             |                                             |
|-----|--------------------------|----------|---------------------------------------------|---------------------------------------------|
|     | <a href="#">Motif 9</a>  | 3.00E+06 |                                             |                                             |
|     |                          | 5 sites  | <small>MEME (v3.0.2) 20.08.12 12:24</small> | <small>MEME (v3.0.2) 20.08.12 12:24</small> |
|     | <a href="#">Motif 10</a> | 3.10E+06 |                                             |                                             |
|     |                          | 2 sites  | <small>MEME (v3.0.2) 20.08.12 12:28</small> | <small>MEME (v3.0.2) 20.08.12 12:28</small> |
| KLA | <a href="#">Motif 1</a>  | 3.20E-25 |                                             |                                             |
|     |                          | 48 sites | <small>MEME (v3.0.2) 20.08.12 11:18</small> | <small>MEME (v3.0.2) 20.08.12 11:18</small> |
|     | <a href="#">Motif 2</a>  | 1.90E-23 |                                             |                                             |
|     |                          | 40 sites | <small>MEME (v3.0.2) 20.08.12 11:18</small> | <small>MEME (v3.0.2) 20.08.12 11:18</small> |
|     | <a href="#">Motif 3</a>  | 1.50E-05 |                                             |                                             |
|     |                          | 24 sites | <small>MEME (v3.0.2) 20.08.12 11:21</small> | <small>MEME (v3.0.2) 20.08.12 11:21</small> |

|                         |          |                                                                                     |                                                                                      |
|-------------------------|----------|-------------------------------------------------------------------------------------|--------------------------------------------------------------------------------------|
| <a href="#">Motif 4</a> | 9.20E+03 | 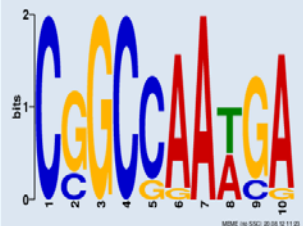   |    |
|                         | 12 sites |                                                                                     |                                                                                      |
| <a href="#">Motif 5</a> | 3.80E+04 |    |    |
|                         | 24 sites |                                                                                     |                                                                                      |
| <a href="#">Motif 6</a> | 2.40E+05 |   |   |
|                         | 16 sites |                                                                                     |                                                                                      |
| <a href="#">Motif 7</a> | 3.50E+05 |  |  |
|                         | 9 sites  |                                                                                     |                                                                                      |
| <a href="#">Motif 8</a> | 2.20E+05 |  |  |
|                         | 10 sites |                                                                                     |                                                                                      |

AGO

|  |                          |          |                                                                                     |                                                                                      |
|--|--------------------------|----------|-------------------------------------------------------------------------------------|--------------------------------------------------------------------------------------|
|  | <a href="#">Motif 9</a>  | 9.20E+05 | 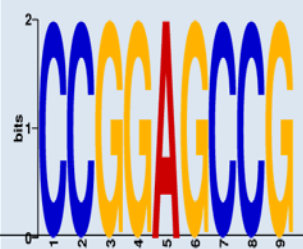   |    |
|  |                          | 2 sites  | <small>MEME (v0.50C) 20.08.12 11:35</small>                                         | <small>MEME (v0.50C) 20.08.12 11:35</small>                                          |
|  | <a href="#">Motif 10</a> | 3.70E+05 |    |    |
|  |                          | 3 sites  | <small>MEME (v0.50C) 20.08.12 11:38</small>                                         | <small>MEME (v0.50C) 20.08.12 11:38</small>                                          |
|  | <a href="#">Motif 1</a>  | 8.60E-05 |   |   |
|  |                          | 29 sites | <small>MEME (v0.50C) 20.08.12 11:40</small>                                         | <small>MEME (v0.50C) 20.08.12 11:40</small>                                          |
|  | <a href="#">Motif 2</a>  | 2.60E-03 |  |  |
|  |                          | 28 sites | <small>MEME (v0.50C) 20.08.12 11:43</small>                                         | <small>MEME (v0.50C) 20.08.12 11:43</small>                                          |
|  | <a href="#">Motif 3</a>  | 1.40E+02 |  |  |
|  |                          | 43 sites | <small>MEME (v0.50C) 20.08.12 11:52</small>                                         | <small>MEME (v0.50C) 20.08.12 11:51</small>                                          |

|                         |          |                                                                                     |                                                                                      |
|-------------------------|----------|-------------------------------------------------------------------------------------|--------------------------------------------------------------------------------------|
| <a href="#">Motif 4</a> | 6.70E+01 |    |    |
|                         | 15 sites |                                                                                     |                                                                                      |
| <a href="#">Motif 5</a> | 1.30E+02 |    |    |
|                         | 28 sites |                                                                                     |                                                                                      |
| <a href="#">Motif 6</a> | 4.90E+05 |   |   |
|                         | 22 sites |                                                                                     |                                                                                      |
| <a href="#">Motif 7</a> | 2.50E+06 |  |  |
|                         | 2 sites  |                                                                                     |                                                                                      |
| <a href="#">Motif 8</a> | 2.60E+06 |  |  |
|                         | 6 sites  |                                                                                     |                                                                                      |

|     |                          |          |                                                                                     |                                                                                      |
|-----|--------------------------|----------|-------------------------------------------------------------------------------------|--------------------------------------------------------------------------------------|
|     | <a href="#">Motif 9</a>  | 1.40E+06 | 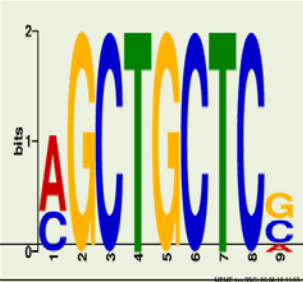   |    |
|     |                          | 20 sites |                                                                                     |                                                                                      |
|     | <a href="#">Motif 10</a> | 3.70E+06 |    |    |
|     |                          | 5 sites  |                                                                                     |                                                                                      |
| DHA | <a href="#">Motif 1</a>  | 9.80E-02 |   |   |
|     |                          | 35 sites |                                                                                     |                                                                                      |
|     | <a href="#">Motif 2</a>  | 3.20E+03 |  |  |
|     |                          | 24 sites |                                                                                     |                                                                                      |
|     | <a href="#">Motif 3</a>  | 5.90E+05 |  |  |
|     |                          | 2 sites  |                                                                                     |                                                                                      |



|                         |          |  |  |
|-------------------------|----------|--|--|
| <a href="#">Motif 4</a> | 1.40E+06 |  |  |
|                         | 2 sites  |  |  |
| <a href="#">Motif 5</a> | 1.40E+06 |  |  |
|                         | 2 sites  |  |  |
| <a href="#">Motif 6</a> | 1.40E+06 |  |  |
|                         | 2 sites  |  |  |
| <a href="#">Motif 7</a> | 1.40E+06 |  |  |
|                         | 2 sites  |  |  |
| <a href="#">Motif 8</a> | 1.40E+06 |  |  |
|                         | 2 sites  |  |  |

|     |                          |          |  |  |
|-----|--------------------------|----------|--|--|
| CAL | <a href="#">Motif 9</a>  | 1.50E+06 |  |  |
|     |                          | 2 sites  |  |  |
|     |                          |          |  |  |
|     | <a href="#">Motif 10</a> | 2.40E+06 |  |  |
|     |                          | 39 sites |  |  |
|     |                          |          |  |  |
| CAL | <a href="#">Motif 1</a>  | 2.60E-39 |  |  |
|     |                          | 50 sites |  |  |
|     |                          |          |  |  |
|     | <a href="#">Motif 2</a>  | 7.50E-20 |  |  |
|     |                          | 50 sites |  |  |
|     |                          |          |  |  |
|     | <a href="#">Motif 3</a>  | 1.80E-09 |  |  |
|     |                          | 49 sites |  |  |
|     |                          |          |  |  |

|                         |          |  |  |
|-------------------------|----------|--|--|
| <a href="#">Motif 4</a> | 4.40E-07 |  |  |
|                         | 50 sites |  |  |
| <a href="#">Motif 5</a> | 1.20E-07 |  |  |
|                         | 48 sites |  |  |
| <a href="#">Motif 6</a> | 3.30E-02 |  |  |
|                         | 19 sites |  |  |
| <a href="#">Motif 7</a> | 2.20E+00 |  |  |
|                         | 23 sites |  |  |
| <a href="#">Motif 8</a> | 1.10E+02 |  |  |
|                         | 17 sites |  |  |

|     |                          |          |                                                                                     |                                                                                      |
|-----|--------------------------|----------|-------------------------------------------------------------------------------------|--------------------------------------------------------------------------------------|
|     | <a href="#">Motif 9</a>  | 1.70E+02 | 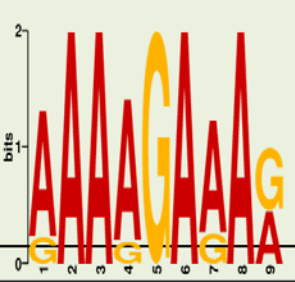   |    |
|     |                          | 50 sites | <small>MEME (no SSC) 16.08.12 17:32</small>                                         | <small>MEME (no SSC) 16.08.12 17:32</small>                                          |
|     |                          |          |                                                                                     |                                                                                      |
|     | <a href="#">Motif 10</a> | 2.60E+02 |    |    |
|     |                          | 26 sites | <small>MEME (no SSC) 16.08.12 17:34</small>                                         | <small>MEME (no SSC) 16.08.12 17:34</small>                                          |
|     |                          |          |                                                                                     |                                                                                      |
| YLI | <a href="#">Motif 1</a>  | 4.00E-19 |   |   |
|     |                          | 32 sites | <small>MEME (no SSC) 17.08.12 15:47</small>                                         | <small>MEME (no SSC) 17.08.12 15:47</small>                                          |
|     |                          |          |                                                                                     |                                                                                      |
|     | <a href="#">Motif 2</a>  | 2.70E-05 |  |  |
|     |                          | 24 sites | <small>MEME (no SSC) 17.08.12 15:50</small>                                         | <small>MEME (no SSC) 17.08.12 15:50</small>                                          |
|     |                          |          |                                                                                     |                                                                                      |
|     | <a href="#">Motif 3</a>  | 3.80E-02 |  |  |
|     |                          | 50 sites | <small>MEME (no SSC) 17.08.12 15:52</small>                                         | <small>MEME (no SSC) 17.08.12 15:52</small>                                          |
|     |                          |          |                                                                                     |                                                                                      |

|                         |          |                                                                                     |                                                                                      |
|-------------------------|----------|-------------------------------------------------------------------------------------|--------------------------------------------------------------------------------------|
| <a href="#">Motif 4</a> | 1.30E-01 | 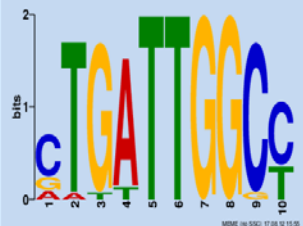   |    |
|                         | 20 sites |                                                                                     |                                                                                      |
| <a href="#">Motif 5</a> | 1.30E+02 |    |    |
|                         | 21 sites |                                                                                     |                                                                                      |
| <a href="#">Motif 6</a> | 2.00E+02 |   |   |
|                         | 35 sites |                                                                                     |                                                                                      |
| <a href="#">Motif 7</a> | 1.20E+04 |  |  |
|                         | 22 sites |                                                                                     |                                                                                      |
| <a href="#">Motif 8</a> | 1.40E+05 |  |  |
|                         | 16 sites |                                                                                     |                                                                                      |
